# Supplementary material
Source: PubMed Central journal article supplement (PMC5972562)

# TB/SIV Study Design

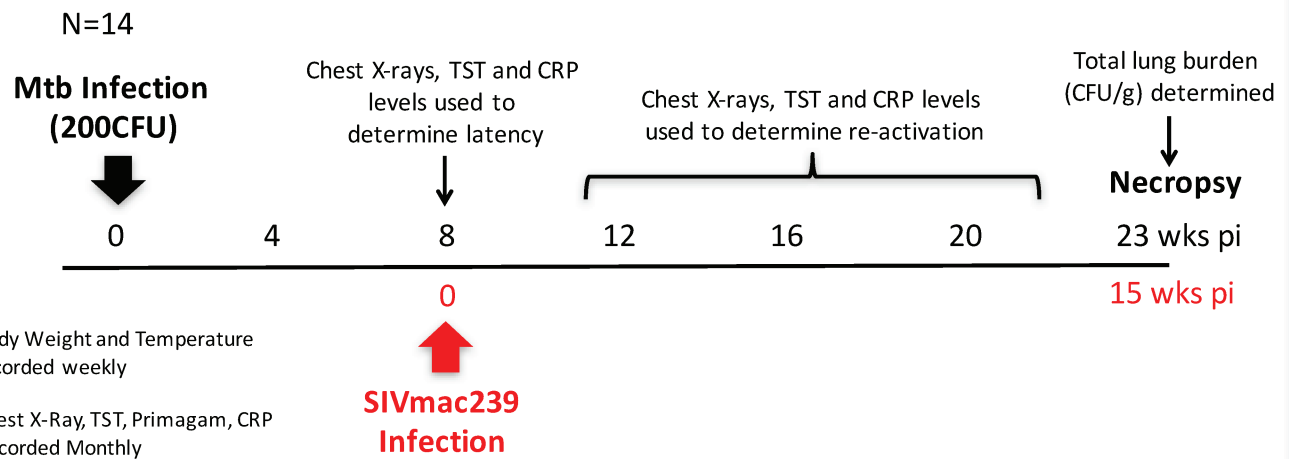

Supplement: jix625_suppl_supplemental_figure_1.pdf [file jix625_suppl_supplemental_figure_1.pdf]

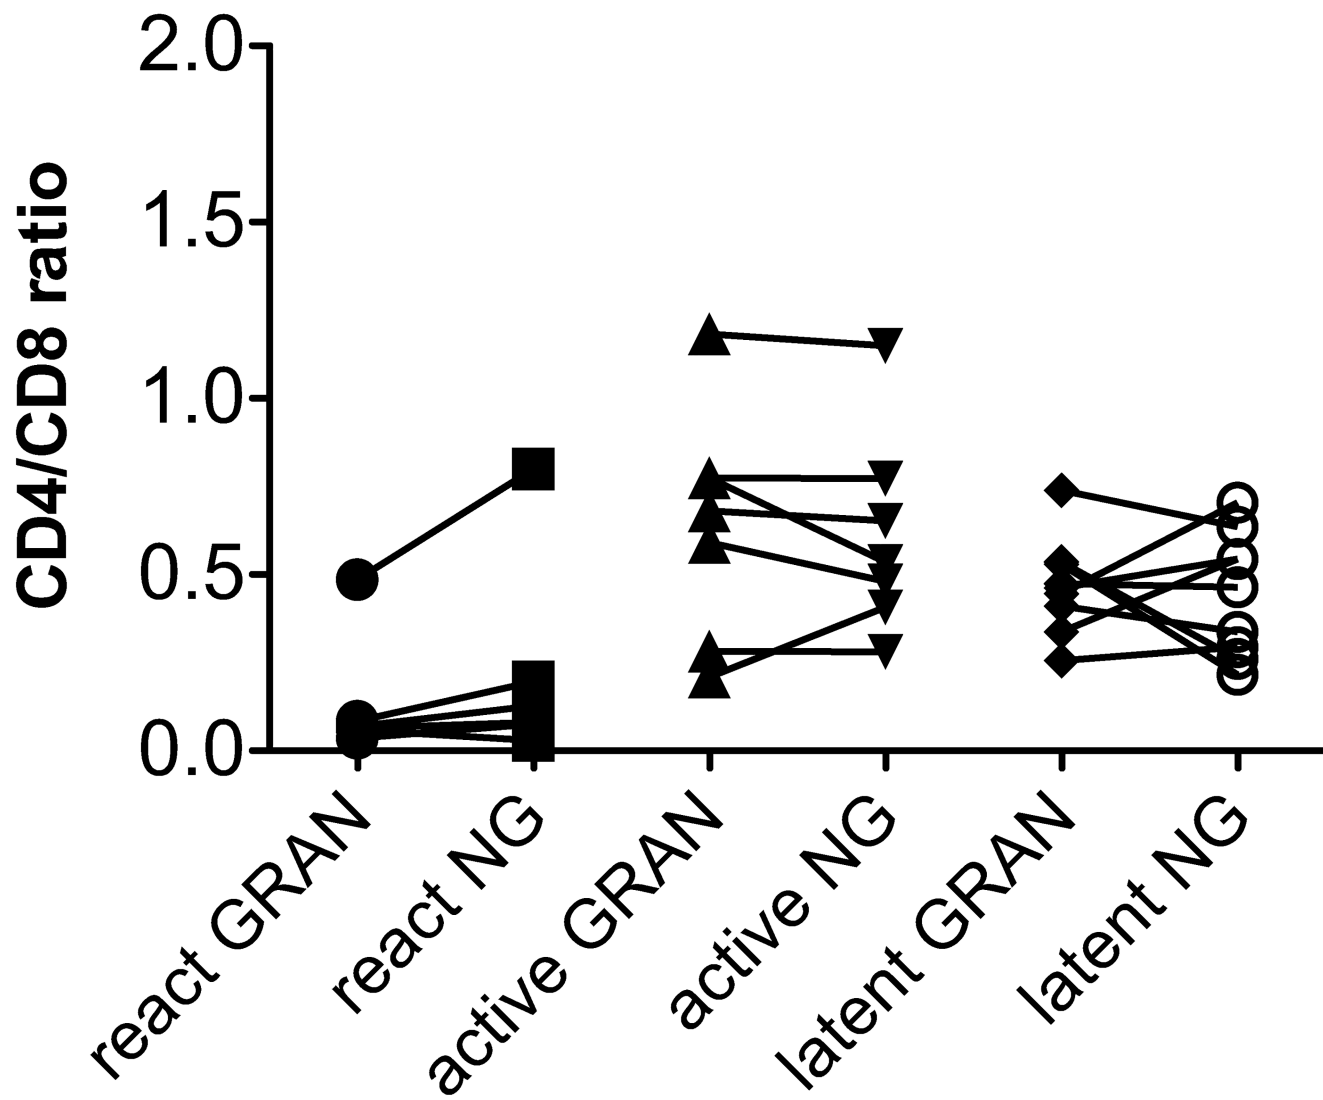

Supplement: jix625_suppl_supplemental_figure_2.pdf [file jix625_suppl_supplemental_figure_2.pdf]

A (uninfected control)

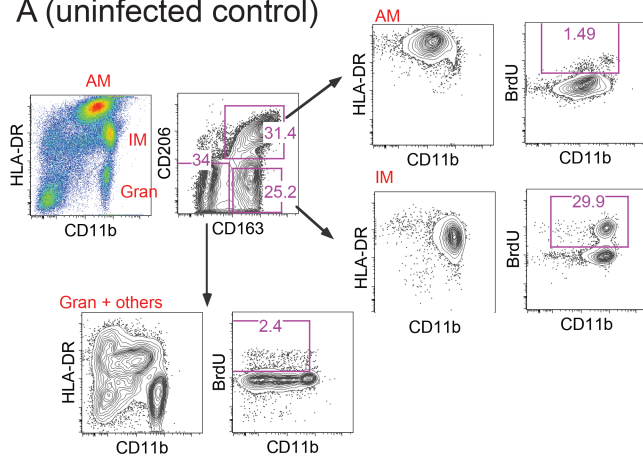

B (TB Latent)

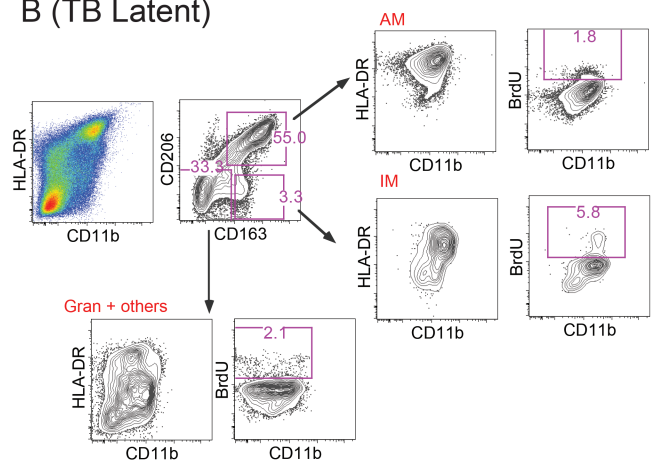

C (TB Latent/SIV)

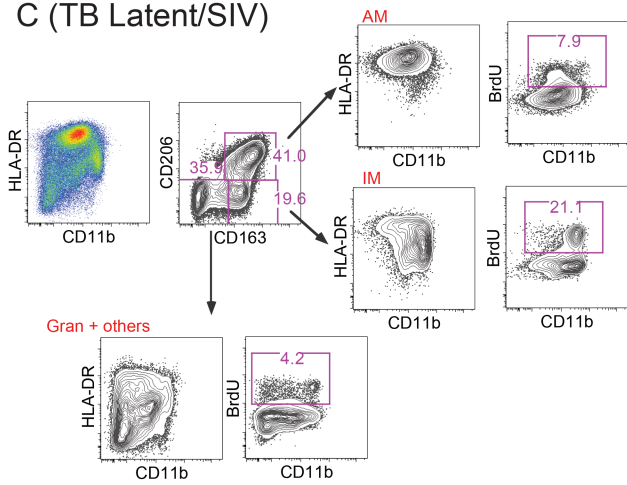

D (TB Reactivated/SIV)

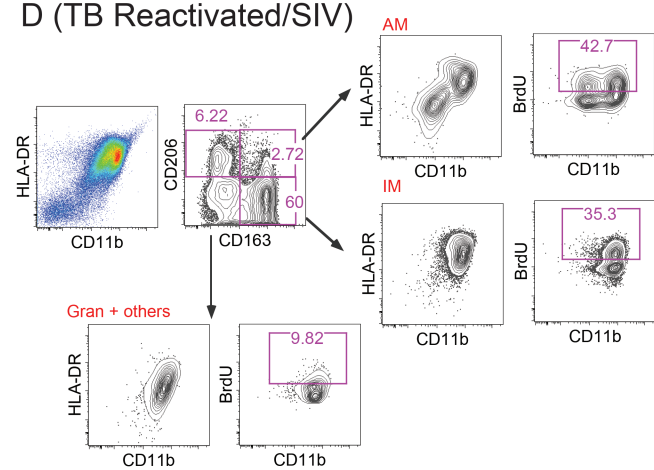

Supplement: jix625_suppl_supplemental_figure_3.pdf [file jix625_suppl_supplemental_figure_3.pdf]
